# Supplementary material for: Origin identification of migratory pests (European Starling) using geochemical fingerprinting
Source: PeerJ. 2020 May 4;8:e8962. doi: 10.7717/peerj.8962 (PMC7204882; doi:10.7717/peerj.8962)
Supplement: Supplemental Information 1 [file peerj-08-8962-s004.xlsx]

## Sheet: Sheet1
Sample No.	Code	Weight	Ca44	K39	Mg24	Na23	Sr88	Mo95	Ag107	Cd111	Sn118	Ba137	Pb208	Al27	S32	Sc45	V51	Cr52	Mn55	Co59	Cu63	Zn66	Se77
sample1	Kel1	0.0834	2760.19	0.547962	42.2302	30.06	1037.34	0.239808	-0.227818	-0.0239808	45.6235	189.964	6.19904	35.6115	2209.98	-0.155875	0.311751	15.0719	26.5228	0.0239808	757.062	627.65	-1.28297
sample 2	Kel2	0.0777	2737.45	0.723295	43.2819	25.8687	892.831	0.0900901	-0.29601	-0.03861	48.3269	86.538	4.33719	33.1789	1564.88	-0.20592	0.21879	2.92149	27.1429	0.01287	803.32	411.557	-1.85328
sample 3	Kel3	0.1014	2739.64	0.822485	39.7633	32.5937	443.274	-0.0591716	-0.236686	-0.0493097	37.4556	76.2525	3.11637	19.9507	954.961	-0.167653	0.118343	2.07101	20.8185	-0.00986193	621.371	234.822	-1.28205
sample 4	Kel4	0.0846	2859.34	0.594563	44.3381	24.7872	521.229	0.0591017	-0.283688	-0.0472813	43.5816	142.861	6.01655	26.2175	1248.5	-0.200946	0.189125	2.52955	24.0071	0	733.983	336.832	-1.48936
sample 5	Kel5	0.0788	2841.37	0.469543	39.2005	33.3503	461.98	-0.0888325	-0.35533	-0.0507614	47.5888	94.6827	12.703	23.566	1045.76	-0.215736	0.203046	2.13198	23.4391	-0.0126904	765.355	345.355	-1.73858
sample 6	Kel6	0.0986	2579.11	0.408722	40.5781	32.8398	644.888	0.182556	-0.30426	-0.020284	37.9006	173.621	15.9331	30.8418	1274.19	-0.172414	0.243408	1.15619	19.8377	0.010142	617.657	315.051	-1.1359
sample 7	Kel7	0.101	2662.38	0.59703	41.297	34.1485	321.366	-0.0594059	-0.287129	-0.039604	36.6634	59.9406	5.54455	26.2079	1183.92	-0.178218	1.22772	8.27723	18.9208	0.00990099	602.663	293.545	-0.683168
sample 8	Kel8	0.0833	2529.41	0.438175	39.3637	33.3133	216.639	-0.0360144	-0.372149	-0.060024	42.7731	42.545	5.006	19.4958	897.743	-0.216086	0.180072	3.93758	20.2761	-0.0120048	729.46	262.545	-1.52461
sample 9	Kel9	0.0796	2655.78	0.395729	41.3065	32.7261	181.256	-0.0753769	-0.40201	-0.0376884	46.0804	37.5503	5.8794	22.8894	1017.7	-0.226131	0.175879	1.4196	23.0276	-0.0125628	786.721	255.113	-1.45729
sample 10	Kel10	0.0841	2554.1	0.833532	42.0809	32.9727	500.036	0.737218	-0.321046	0	44.1023	144.899	59.0844	52.2711	1780.21	-0.214031	0.475624	4.73246	27.7289	0	717.562	495.41	-1.15339
sample 11	Kel11	0.0848	2469.34	0.392689	40.283	31.4858	527.925	0.141509	-0.247642	-0.0353774	44.3396	76.1203	4.72877	21.5802	1453.82	-0.200472	0.188679	1.58019	23.6439	-0.0117925	699.127	363.927	-1.43868
sample 12	Kel12	0.071	2374.65	1.2831	37.662	33.169	600.789	0.112676	-0.43662	-0.028169	51.3662	177.859	14.4789	55.2113	1761.45	-0.253521	0.56338	2.38028	27.9718	0.0140845	837.254	497.761	-1.49296
sample 13	Kel13	0.0899	2300.33	0.420467	34.4383	28.9099	415.717	0.0667408	-0.400445	-0.0333704	41.3126	106.463	6.88543	35.4505	1437.47	-0.200222	0.28921	3.02558	23.6374	-0.0111235	656.529	330.501	-1.53504
sample 14	Kel14	0.0675	2377.78	0.448889	37.6148	29.2296	240.815	-0.0444444	-0.474074	-0.0592593	55.037	63.5111	6.28148	23.4815	1167.54	-0.266667	0.222222	1.58519	24.7556	0	879.111	332.889	-2.11852
sample 15	Kel15	0.0887	2547.91	0.281849	42.6268	33.7317	752.864	0.42841	-0.405862	-0.0450958	40.6426	167.475	4.93799	29.5603	1991	-0.191657	0.462232	4.0699	25.5242	0	651.995	505.784	-1.16122
sample 16	Kel16	0.0975	2629.74	0.323077	39.2	33.8154	689.456	0.328205	-0.358974	-0.0205128	38.2256	121.077	21.7538	50.5231	2010.86	-0.174359	0.441026	10.0615	27.7026	0.0205128	595.867	470.215	-0.974359
sample 17	Kel17	0.09	2482.22	0.335556	43.0222	32.2667	504.644	0.511111	-0.422222	0.0111111	41.5	229.778	7.42222	33.4444	1800.08	-0.2	0.333333	2.25556	28.9222	0	660.844	410.033	-0.855556
sample 18	Kel18	0.078	2551.28	0.973077	41.2564	33.9103	229.064	-0.0641026	-0.487179	-0.0384615	46.1154	81.9487	4.70513	35.5385	1516.74	-0.230769	0.25641	3.34615	26.7051	0	758.731	376.487	-1.32051
sample 19	Kel19	0.0731	2757.87	0.54446	43.1327	35.7592	921.642	-0.0136799	-0.588235	-0.0410397	51.5732	105.048	6.85363	32.2435	1403.37	-0.246238	0.519836	4.59644	26.9083	0	813.215	392.298	-1.13543
sample 20	Kel20	0.096	2153.12	0.8125	34.4167	30.0312	517.969	0.177083	-0.09375	-0.0520833	44.7708	95.5833	5.26042	47.5833	896.583	-0.03125	0.270833	1.04167	16.4062	0.03125	676.01	250.365	0.447917
sample 21	V1S1	0.085	2456.47	2.52588	45.4588	40.8706	426	-0.0235294	-0.129412	-0.0588235	47.2471	75.9176	3.36471	79.7647	1001.04	-0.105882	0.317647	3.69412	18.0706	0.0352941	772.576	320.529	0.117647
sample 22	V1S2	0.0776	2154.64	2.50129	40.9149	31.6237	482.912	-0.0386598	-0.141753	-0.0515464	50.1546	86.2629	3.63402	172.642	1122.72	-0.128866	0.231959	1.35309	19.3814	0.0257732	839.729	365.412	-0.154639
sample 23	V1S3	0.077	2496.1	2.42338	50.1558	38.7922	973.221	0.0779221	-0.142857	-0.0779221	51.3506	217.948	4.07792	42.987	1442.75	-0.12987	0.207792	1.06494	24.6883	0.038961	855.26	411.312	-0.0909091
sample 24	V1S4	0.0747	2161.98	1.23829	42.7979	29.6921	506.787	0.0133869	-0.227577	-0.0401606	52.7711	65.2878	3.74833	119.799	1411.83	-0.133869	0.281124	1.29853	22.9719	0.0401606	880.482	392.329	1.45917
sample 25	V1S5	0.0746	2183.65	2.13807	38.0295	34.2493	607.52	0.0536193	-0.201072	-0.0536193	53.3512	99.7319	4.32976	133.646	1408.69	-0.147453	0.41555	3.27078	27.2118	0.0402145	883.271	385.523	0.0402145
sample 26	V1S6	0.0601	2166.39	2.02163	42.5125	26.8053	412.163	-0.0665557	-0.183028	-0.0499168	65.391	79.4509	5.39101	123.245	1429.55	-0.183028	0.299501	1.38103	28.1531	0.0499168	1086.89	427.987	-0.349418
sample 27	V1S7	0.0587	2195.91	1.52641	37.5128	29.506	480.869	-0.272572	-0.44293	-0.255537	66.2351	87.3424	4.68484	47.1039	1044.92	0	0.391823	1.26065	24.3952	0.136286	1079.71	406.286	0.11925
sample 28	V1S8	0.074	2310.81	2.75946	40.6892	38.2027	736.5	-0.0945946	-0.540541	-0.310811	51.2297	208.73	6.47297	440.176	1462.69	-0.148649	0.513514	1.85135	24.4459	0.0405405	842.378	471.932	0.662162
sample 29	V1S9	0.0841	2670.63	3.26278	48.8109	38.4423	766.409	-0.142687	-0.511296	-0.285375	46.1237	236.04	4.6849	60.868	1431.47	-0.142687	0.178359	1.85493	20.7015	0.0237812	721.367	451.57	0.0713436
sample 30	V1S10	0.0821	2522.53	1.70767	43.8246	36.6991	644.933	-0.231425	-0.499391	-0.280146	47.296	329.842	4.96955	46.553	1158.68	-0.146163	0.365408	1.24239	21.8392	0.0243605	743.959	372.582	0.255786
sample 31	V4F1	0.0793	2616.65	3.69357	51.3367	38.0706	767.1	-0.138714	-0.529634	-0.277427	49.4199	187.478	9.58386	56.5826	1705.07	-0.151324	0.554855	45.8386	23.2913	0.113493	746.974	530	0.138714
sample 32	V4F2	0.0727	2042.64	2.76479	39.6011	29.5736	457.923	-0.302613	-0.618982	-0.288858	52.3109	76.9739	5.70839	140.495	1295.32	-0.165062	0.536451	19.8349	20.784	0.0550206	826.066	421.596	1.22421
sample 33	V4F3	0.0637	2792.78	2.57457	51.6327	42.5432	787.755	-0.392465	-0.706436	-0.345369	59.9529	159.812	5.49451	147.865	1082.15	-0.188383	0.596546	1.85243	22.7159	0.0313972	929.874	370.126	0.832025
sample 34	V4F4	0.0553	2482.82	1.2387	48.5172	30.651	675.118	-0.34358	-0.813743	-0.433996	71.0307	152.224	7.10669	74.5027	1174.81	-0.216998	0.307414	7.45027	24.4485	0.0361664	1095.44	401.429	-0.0904159
sample 35	V4F5	0.0769	2247.07	1.13004	44.7594	28.5306	762.289	-0.247074	-0.598179	-0.286086	50.4941	103.719	3.78414	39.2328	1097.15	-0.156047	0.416125	40.6762	18.2055	0.0780234	787.594	346.138	0.260078
sample 36	V4M2	0.0728	2491.76	1.5261	55.2747	29.2857	615.604	-0.247253	-0.563187	-0.315934	53.0769	81.1676	4.58791	115.247	1059.13	-0.178571	0.535714	62.5412	20.3846	0.123626	812.473	327.665	0.288462
sample 37	V4M3	0.0699	2642.35	2.08155	51.1588	34.9785	525.637	0.114449	-0.615165	-0.314735	55.0501	78.3119	4.84979	27.0815	1097.54	-0.171674	0.257511	7.98283	19.5279	0.0286123	850.787	361.788	0.55794
sample 38	V4M4	0.0711	2250.35	2.67932	37.1589	33.8819	533.713	-0.0843882	-0.7173	-0.323488	54.5429	79.3108	5.09142	86.4698	1576.88	-0.168776	1.6737	138.284	23.5302	0.225035	834.895	467.159	0.829817
sample 39	V4M5	0.0817	2203.18	2.83231	36.3647	37.2583	528.776	-0.269278	-0.587515	-0.257038	45.3366	73.2803	3.76989	111.958	1331.81	-0.146879	0.452876	30.7711	22.1053	0.0489596	733.892	404.076	0.746634
sample 40	V4M1	0.0834	2303.36	3.11751	42.1823	37.7938	361.331	-0.215827	-0.57554	-0.275779	46.4388	69.3285	3.56115	35.7074	985.072	-0.143885	0.227818	0.659472	20.0719	0.0239808	712.11	308.897	0.719424
sample 41	V8F1	0.0858	2667.83	1.91142	41.7483	37.0979	462.063	-0.128205	-0.559441	-0.268065	45.4312	79.0559	4.62704	48.6597	1447.82	-0.13986	0.710956	0.920746	21.1422	0.034965	697.681	397.541	1.7366
sample 42	V8F2	0.0776	2625	1.84923	44.4974	38.0799	451.662	-0.244845	-0.631443	-0.296392	51.0696	112.796	28.8144	87.2809	1051.37	-0.167526	0.476804	0.824742	21.4175	0.0257732	780.966	355.374	0.412371
sample 43	V8F3	0.0482	2475.1	1.04564	43.8382	32.3237	236.826	-0.33195	-1.0166	-0.352697	79.0456	57.2407	8.361	99.0871	1075.44	-0.248963	1.18257	1.3278	30.6432	0.103734	1261.27	408.32	0.373444
sample 44	V8F4	0.0748	2165.78	2.53743	39.8128	33.6096	567.487	-0.213904	-0.641711	-0.294118	52.8476	155.254	5.1738	60.8422	1501.94	-0.160428	0.762032	1.08289	22.3262	0.026738	791.925	415.976	0.508021
sample 45	V8M1	0.059	2127.12	0.779661	43.1864	25.9322	887.492	-0.254237	-0.79661	-0.423729	66.1017	235.085	6.0339	112.898	1308.36	-0.20339	1.0678	0.881356	26.4407	0.0338983	1035.59	457.78	0.322034
sample 46	V8M2	0.0769	2379.71	1.15865	48.2835	31.2354	549.74	0.221066	-0.650195	-0.312094	49.5059	99.0637	3.71912	53.173	955.475	-0.169051	0.195059	0.83225	18.3095	0.0260078	766.658	393.797	0.780234
sample 47	V8M3	0.0789	2442.33	1.51838	47.8834	31.6477	591.825	0.101394	-0.621039	-0.278834	48.8593	135.184	4.43599	37.7313	1725.22	-0.164766	0.392902	0.608365	19.0114	0.0253485	762.193	332.129	0.544994
sample 48	V8M4	0.0725	2635.86	1.92552	49.0621	34.8138	268.924	-0.303448	-0.648276	-0.317241	56.9379	121.876	4.31724	61.7517	1247.41	-0.165517	0.289655	0.689655	21.1172	0.0275862	835.683	331.448	1.07586
sample 49	V8M5	0.0804	2185.32	1.17164	45.4851	29.4154	708.595	-0.149254	-0.621891	-0.298507	47.8607	194.266	3.80597	43.296	1659.86	-0.161692	0.199005	0.634328	19.8134	0.0248756	752.363	374.59	1.0199
sample 50	V6M1	0.0676	2170.12	1.13905	46.2722	32.426	315.858	-0.35503	-0.739645	-0.340237	58.9645	72.0414	6.02071	112.041	1118.64	-0.192308	0.414201	0.621302	20.2367	0.0295858	876.583	347.204	0.857988
sample 51	V6M2	0.0715	2251.75	1.05874	44.6853	27.7343	790.28	-0.237762	-0.713287	-0.321678	51.7063	151.93	4.41958	47.6923	1251.65	-0.167832	0.433566	0.615385	19.8322	0.027972	814.531	355.804	0.629371
sample 52	V6M3	0.0607	2205.93	0.286656	48.5832	22.7677	246.046	-0.29654	-0.840198	-0.395387	63.6079	55.7166	5.10708	57.5124	1086.95	-0.197694	0.230643	0.790774	22.4876	0.0164745	996.82	331.038	0.543657
sample 53	V6M4	0.0661	2267.78	0.14826	44.9924	24.7958	253.843	-0.302572	-0.771558	-0.347958	56.8533	56.9592	4.61422	38.9259	1127.46	-0.196672	0.332829	0.484115	21.7852	0.0151286	911.029	374.69	0.136157
sample 54	V6F1	0.0802	2364.09	0.428928	43.1796	33.4663	556.272	-0.174564	-0.623441	-0.274314	49.1022	50.2743	4.38903	29.3641	1001.31	-0.149626	0.486284	0.561097	17.6683	0.0124688	741.833	360.212	0.0374065
sample 55	V6F2	0.0527	2258.06	0.855787	46.129	30.3985	574.611	-0.436433	-0.986717	-0.474383	71.537	94.9526	5.78748	40.759	1037.76	-0.246679	0.379507	3.13093	24.1746	0.0189753	1123.91	377.495	0.777989
sample 56	V6F3	0.0826	2478.21	0.866828	43.6925	32.2034	341.199	-0.242131	-0.605327	-0.27845	46.1622	116.429	3.75303	30.6053	946.259	-0.157385	0.31477	1.05327	17.4818	0.0121065	710.145	340.412	0.690073
sample 57	V6F4	0.0714	2578.43	2.30672	46.0224	30.7703	363.319	1.27451	-0.70028	-0.294118	53.2353	70.2941	6.89076	139.888	1126.4	-0.168067	1.69468	2.03081	18.5574	0.0420168	858.88	334.3	0.630252
sample 58	V6F5	0.068	2894.12	0.748529	48.4853	35.3235	765.941	-0.367647	-0.764706	-0.338235	57.0735	90.9853	4.35294	32.1471	1329.29	-0.176471	0.264706	1.60294	23.5147	0.0441176	857.824	474.941	0.558824
sample 59	O2F1	0.0715	2085.31	0.537063	35.3007	26.3357	289.427	-0.307692	-0.643357	-0.321678	54.4895	40.0559	6.22378	26.2378	802.783	-0.167832	0.195804	0.909091	19.986	0.013986	823.93	336.112	0.615385
sample 60	O2F2	0.0865	2338.73	1.07052	39.7457	36.6012	860.382	-0.0693642	-0.520231	-0.254335	43.7572	68.2659	5.58382	19.3179	1088.45	-0.138728	0.427746	0.65896	17.0058	0.0115607	672.671	325.838	0.358382
sample 61	O2F3	0.0769	2599.48	1.36671	47.1131	37.7243	382.159	0.0520156	-0.195059	-0.0390117	50.5592	76.1638	10.7802	34.1352	1230.53	-0.156047	0.195059	0.923277	23.8882	-0.0390117	870.754	387.542	0.0780234
sample 62	O2F4	0.0778	2520.57	0.90874	46.7481	35.4242	586.761	0.0642674	-0.282776	-0.0385604	50.8612	81.671	13.6504	24.6401	1206.71	-0.231362	0.179949	0.706941	23.3805	-0.0385604	856.324	378.085	-0.616967
sample 63	O2F5	0.0811	2459.93	0.836005	43.1443	32.6757	403.6	0.110974	-0.27127	-0.0369914	49.6178	65.1665	5.64735	28.0518	1162.49	-0.246609	0.172626	0.702836	21.5783	-0.0246609	822.713	368.989	-0.27127
sample 64	O2M1	0.0345	2953.62	1.4058	48.9855	37.8841	343.768	-0.0289855	-0.695652	-0.115942	119.71	67.4493	17.3043	69.3333	1130.9	-0.57971	0.347826	1.5942	39.1884	-0.115942	1867.94	545.536	-1.18841
sample 65	O2M2	0.0947	2407.6	1.36642	44.604	35.755	323.918	0.126716	-0.30623	-0.031679	40.7392	73.4847	12.3548	23.5797	1155.35	-0.221753	0.179514	1.43611	17.4868	-0.0211193	685.016	333.136	-0.200634
sample 66	O2M3	0.0994	2449.7	1.28571	42.3139	33.8028	401.811	0.100604	-0.251509	-0.0301811	39.9698	59.3058	5.30181	24.4266	1153.18	-0.211268	0.191147	0.593561	16.0161	-0.0301811	653.531	329.185	-0.0905433
sample 67	O2M4	0.0806	2337.47	0.91067	40.9553	33.5732	341.749	0.111663	-0.372208	-0.0620347	49.5906	146.948	4.92556	35.2481	1186.25	-0.260546	0.28536	1.067	21.9603	-0.0372208	817.829	355.844	-0.0372208
sample 68	O2M5	0.0818	2387.53	0.778729	43.6064	32.3105	503.264	0.0855746	-0.378973	-0.0611247	48.8998	68.9242	9.42543	23.9609	1271.69	-0.256724	0.232274	1.77262	20.8557	-0.0366748	807.787	412.054	-0.268949
sample 69	O4F1	0.0833	2471.79	1.89556	41.5006	36.3385	365.642	0.0240096	-0.408163	-0.0360144	47.1549	72.7251	5.2581	51.9808	1230.6	-0.252101	0.204082	1.5006	22.437	-0.0360144	795.846	347.623	-0.132053
sample 70	O4F2	0.0725	2307.59	0.764138	40.0828	33.4483	434.593	0.17931	-0.441379	-0.0551724	55.669	90.0966	11.2966	28.6069	1206.48	-0.289655	0.193103	1.62759	24.1931	-0.0413793	905.352	415.628	-0.206897
sample 71	O4F3	0.0807	2318.46	1.87113	39.9133	33.7051	520.099	0.0495663	-0.421314	-0.0371747	50.4957	80.5452	7.7943	25.0682	1177.48	-0.272615	0.173482	1.46221	23.0607	-0.0371747	798.501	370.434	-0.0743494
sample 72	O4M1	0.0902	2297.12	1.15632	38.7805	32.6275	382.35	0.0110865	-0.37694	-0.0443459	43.3925	35.6652	3.75831	20.2106	1229.96	-0.243902	0.620843	1.4745	20	-0.0332594	724.224	335.044	-0.221729
sample 73	O4M2	0.0997	2425.28	1.21163	42.3972	34.4233	378.766	0.100301	-0.341023	-0.0300903	39.7994	62.3571	6.21866	17.3019	1261.65	-0.220662	0.290873	1.47442	20.321	-0.0200602	641.354	326.158	-0.170512
sample 74	O4M3	0.0909	2311.33	1.70847	42.7283	35.1045	477.404	0.0990099	-0.121012	-0.0770077	45.4675	88.2178	6.80968	25.9626	1330.86	-0.0440044	0.154015	1.56216	22.8823	-0.0440044	711.221	380.968	0.29703
sample 75	O4M4	0.0856	2419.39	0.956776	44.7079	31.8575	304.416	0.116822	-0.128505	-0.0700935	46.9276	73.4463	5.66589	28.5397	1345.33	-0.0934579	0.198598	0.864486	23.8435	-0.046729	765.631	361.834	0.186916
sample 76	O4M5	0.072	2323.61	1.08889	38.9583	32.75	417.472	0.0972222	-0.166667	-0.0972222	56.5972	110.694	4.93056	33.5139	1391.69	-0.125	0.25	0.736111	29.3889	-0.0555556	904.583	377.722	0.166667
sample 77	N1bF1	0.0601	2424.29	0.237937	43.8602	29.2845	256.772	0.0499168	-0.266223	-0.116473	68.0033	59.6007	4.50915	34.0765	1184.03	-0.14975	0.46589	32.1631	29.7338	-0.0332779	1088.32	399.983	-0.0499168
sample 78	N1bF2	0.0663	2324.28	0.809955	43.4389	27.9186	495.309	-0.0452489	-0.25641	-0.105581	59.7134	80.8748	4.25339	52.6094	1190.97	-0.135747	0.15083	0.66365	26.546	-0.0754148	989.246	350.151	-0.0904977
sample 79	N1bF3	0.0536	2177.24	0.869403	37.8731	30.597	324.049	-0.0559701	-0.354478	-0.149254	78.7873	82.7239	5.74627	43.8806	1119.14	-0.16791	0.205224	1.08209	28.694	-0.0932836	1183.3	380.784	-0.186567
sample 80	N1bF4	0.0738	2180.22	1.04472	41.9512	31.0027	346.043	-0.0271003	-0.243902	-0.108401	53.7263	89.065	4.13279	31.1382	1160.11	-0.121951	0.135501	4.71545	21.1518	-0.0542005	863.645	327.127	0.0813008
sample 81	N1bF5	0.0764	2164.92	1.69634	39.8691	34.6859	430.51	0.209424	-0.248691	-0.078534	51.8455	67.7356	3.61257	30.8508	1157.13	-0.117801	0.287958	24.7251	24.6728	-0.013089	856.139	359.058	0.104712
sample 82	N1bF6	0.0596	2330.54	0.280201	42.9027	31.6107	344.681	-0.033557	-0.352349	-0.11745	65.1007	61.3926	5.16779	33.5738	948.523	-0.151007	0.167785	0.45302	26.6946	-0.0671141	1089.08	346.258	-0.184564
sample 83	N1bF7	0.0541	2375.23	0.173752	48.5028	32.939	359.131	0	-0.369686	-0.12939	75.2495	66.2107	5.36044	62.6433	1236.12	-0.166359	0.166359	1.0536	31.1275	-0.0739372	1189.11	400.739	0.351201
sample 84	N1bM1	0.0821	2197.32	0.816078	44.8965	34.3727	396.882	-0.0121803	-0.267966	-0.0609013	48.6845	64.9817	3.03289	20.4994	1188.29	-0.109622	0.133983	0.755177	22.5091	-0.0487211	803.24	338.295	0.389769
sample 85	N1bM2	0.0571	2478.11	0.570928	46.2172	32.8546	556.147	0	-0.367776	-0.122592	68.2137	90.5604	5.4641	41.0333	1257.06	-0.157618	0.227671	1.97898	29.1243	-0.0700525	1159.05	398.739	-0.0700525
sample 86	N1bM3	0.0694	2260.81	0.733429	43.7608	34.5677	543.732	0.0144092	-0.144092	-0.100865	56.5418	53.9914	7.08934	28.2997	1115.48	-0.0720461	0.115274	4.88473	25.5764	-0.0576369	939.755	337.565	-0.0288184
sample 87	N1bM6	0.0663	2295.63	1.66516	43.7406	33.1976	602.896	0	-0.196078	-0.135747	58.7481	122.081	4.96229	32.368	1108.91	-0.135747	0.135747	1.61388	25.2187	-0.0754148	962.866	348.703	-0.633484
sample 89	N1bM7	0.0691	2280.75	1.03763	43.1404	32.8509	245.441	-0.0434153	-0.173661	-0.115774	58.4805	64.4139	4.55861	51.5485	957.438	-0.144718	0.419682	12.1708	23.6035	-0.0434153	943.864	345.832	-0.130246
sample 89	N4F1	0.0602	2358.8	0.730897	40.4651	35.1993	246.512	-0.0332226	-0.199336	-0.0830565	65.0664	69.8671	5.38206	45.1661	932.259	-0.166113	0.166113	0.780731	25.1661	-0.0498339	1089.58	376.395	0.116279
sample 90	N4M1	0.077	2649.35	2.15844	47.0779	46.4156	727.961	-0.025974	-0.168831	-0.103896	52.4286	45.026	3.93506	26.5714	1383.35	-0.12987	0.142857	1.20779	24.2857	-0.0519481	847.052	403.312	0.0649351
sample 91	N4M2A	0.0625	2259.2	0.5776	41.216	35.936	274.304	-0.064	-0.208	-0.16	63.888	65.136	4.512	25.76	955.056	-0.16	0.144	1.088	25.856	-0.064	1041.92	344.592	-0.096
sample 92	N4M3A	0.0753	2253.65	1.31474	37.3971	38.5657	345.989	-0.0398406	-0.212483	-0.119522	54.7543	56.5737	5.86985	30.8499	1169.48	-0.132802	0.159363	0.982736	23.9973	-0.0531208	896.348	354.635	0.478088
sample 93	N4M4A	0.0659	2191.2	0.92261	40.5159	33.1108	459.97	-0.060698	-0.227618	-0.121396	60.5159	40.258	7.19272	23.2625	1010.65	-0.151745	0.151745	4.27921	25.4325	-0.060698	980.137	356.722	0.440061
sample 94	N1BF8	0.0675	2962.96	0	0	0	371.378	0.0444444	-0.237037	-0.118519	58.1778	52.8889	4.26667	26.3704	1269.21	-0.148148	0.162963	0.82963	25.6444	-0.0592593	990.904	409.481	0.385185
sample 95	N1BM4	0.0648	2351.85	1.33179	43.287	32.1142	467.022	-0.0462963	-0.262346	-0.108025	63.5494	70.5556	4.19753	36.3889	1246.68	-0.154321	0.138889	1.6358	25.1235	-0.0617284	999.028	385.015	-0.0154321
sample 96	N1BM5	0.0367	2459.4	0.536785	47.2752	31.4714	451.09	-0.163488	-0.463215	-0.217984	108.338	96.7847	7.35695	54.7411	934.469	-0.27248	0.326975	0.762943	39.4823	-0.13624	1773	456.785	-0.517711
sample 97	N1BM8	0.0633	2568.72	0.946288	44.7393	37.2038	311.327	-0.0631912	-0.28436	-0.14218	61.5956	62.9858	4.62875	127.867	1144.47	-0.157978	0.252765	9.79463	26.0821	-0.0473934	1027.08	399.51	0.14218
sample 98	N4F2	0.0659	2153.26	0.326252	41.0774	30.5463	193.05	-0.030349	-0.257967	-0.121396	63.2777	63.0046	4.00607	42.6859	970.501	-0.151745	0.197269	1.12291	23.8998	-0.0758725	998.847	393.096	0.546282
sample 99	N4F3A	0.0463	2494.6	1.71274	42.3974	39.4168	633.391	-0.0863931	-0.410367	-0.172786	81.7711	80.0432	6.2419	47.149	984.428	-0.215983	0.194384	1.53348	34.4276	0	1407.62	427.905	0.907127
sample 100	P1F1	0.0656	2184.45	1.96799	44.4512	40.3963	256.799	-0.0609756	-0.304878	-0.121951	61.2348	52.3018	7.71341	22.7287	953.704	-0.152439	0.137195	3.20122	23.6128	0	1020.9	351.966	0.289634
sample 101	P1F2	0.0991	2187.69	2.63976	44.7427	42.4117	341.574	0.0100908	-0.0908174	-0.0908174	39.8688	82.7952	9.4551	15.6004	893.582	-0.0605449	0.0807265	1.17053	17.2048	0	640.272	277.83	0.262361
sample 102	P1F3A	0.0061	18180.3	11.1475	334.918	346.557	3415.25	-0.163934	-1.80328	-1.31148	673.115	973.607	249.344	305.41	10165.9	-1.47541	2.13115	99.6721	251.967	0.163934	10822.6	3673.11	0.819672
sample 103	P1M1A	0.0688	1876.45	0.382267	32.3256	29.564	333.241	0	-0.159884	-0.130814	58.6047	44.3895	5.90116	24.4186	835.407	-0.130814	0.159884	0.799419	22.4564	-0.0145349	939.535	307.645	0.218023
sample 104	P2F1A	0.0778	1960.15	1.16581	41.3368	39.4087	418.83	-0.0385604	-0.154242	-0.102828	51.3753	108.201	6.97943	20.9383	1000.31	-0.115681	0.141388	3.38046	22.2494	0.0128535	845.039	306.568	0.231362
sample 105	P2F2A	0.0678	2151.92	0.730088	40.944	38.4366	246.799	-0.0442478	-0.176991	-0.103245	58.7611	66.4012	7.89086	32.4041	985.59	-0.132743	0.147493	0.899705	24.9558	0	961.224	350.428	0.0589971
sample 106	P2M1A	0.0673	2069.84	2.8737	36.4487	38.3507	467.92	-0.0594354	-0.163447	-0.13373	57.89	70.0446	6.41902	32.1545	990.431	-0.148588	0.104012	0.534918	25.2452	0	949.896	348.826	0.267459
sample 107	P2M2	0.0779	1896.02	1.02824	36.1489	33.6329	554.39	-0.0385109	-0.141207	-0.102696	51.5404	74.1463	4.31322	36.7522	969.397	-0.12837	0.12837	0.590501	22.0154	0	809.525	292.953	0.192555
sample 108	P2M3A	0.07087	2434.03	2.6344	43.1071	44.0384	367.01	0.253986	-0.197545	-0.112883	55.1714	51.2205	5.63003	31.847	870.721	-0.141103	0.169324	0.493862	20.8974	0	891.153	296.811	0.155214
sample 109	P3F1A	0.0818	2128.36	1.50611	36.1858	35.6968	291.002	-0.0366748	-0.158924	-0.110024	49.2054	87.6284	4.27873	18.2763	963.521	-0.122249	0.0977995	0.354523	21.5892	0	786.088	340.134	0.342298
sample 110	P3M1A	0.0633	1977.88	0.944708	39.4787	36.6351	364.186	-0.0631912	-0.189573	-0.14218	64.0284	94.4076	11.5166	35.4502	1054.5	-0.14218	0.173776	0.56872	25.1027	0	1014.53	396.493	0.42654
sample 111	P4M1a	0.0688	2095.93	2.20058	38.0959	37.5145	292.544	-0.0436047	-0.203488	-0.101744	56.4099	89.7674	19.782	23.0087	1077.46	-0.145349	0.130814	1.16279	22.718	0	929.084	347.384	0.0436047
sample 112	P4M2a	0.666	229.279	0.0426426	3.9985	3.31532	32.9505	0.003003	-0.0195195	-0.0135135	5.86937	8	1.24324	2.58709	89.2853	-0.015015	0.015015	0.0600601	2.48498	0	99.3904	32.8784	0.0780781
sample 113	P4F1	0.0533	2135.08	2.2364	36.1538	36.7917	293.265	-0.0187617	-0.281426	-0.150094	75.6098	81.3133	33.8086	49.6998	1053.79	-0.187617	0.187617	3.6773	30.1501	0	1236.17	388.499	0.600375
sample 114	P2F3a	0.0721	2160.89	1.86546	34.6047	34.7295	386.907	0.249653	-0.110957	-0.0693481	47.4896	103.093	6.15811	26.6852	1085.1	-0.305132	0.291262	1.12344	25.3398	0.110957	828.017	357.268	-0.638003
sample 115	J-PD1	0.0672	2263.39	1.67113	41.3393	38.244	442.619	0.0744048	-0.119048	-0.0892857	53.0952	85.625	9.94048	26.1012	1083.85	-0.47619	0.223214	1.38393	32.2321	0.0892857	890.551	359.345	-1.23512
sample 116	J-PD2	0.0572	2083.92	2.45979	42.9371	40.4021	1830	0.0874126	-0.192308	-0.157343	59.8427	60.5245	4.47552	25.9266	1169.49	-0.576923	0.297203	6.60839	30.8566	0.122378	1066.22	429.441	-1.53846
sample 117	J-K2F1	0.0804	2226.37	2.55224	41.1443	38.607	457.164	0.0995025	-0.124378	-0.0497512	46.107	74.1418	3.49502	20.995	1201.11	-0.410448	0.199005	1.35572	23.8184	0.0870647	738.706	371.53	-0.945274
sample 118	J-K2F2	0.0674	2084.57	2.77448	42.092	38.5608	236.053	0.637982	-0.192878	-0.0593472	50.5786	35.2671	4.51039	56.7062	1139.35	-0.489614	0.326409	1.18694	28.9614	0.608309	906.884	402.033	-1.18694
sample 119	J-K2F3a	0.0739	1864.68	1.38295	37.9973	29.7158	195.737	0.649526	-0.14885	-0.0541272	46.7388	55.6563	4.43843	49.6888	1064.37	-0.446549	0.2977	1.12314	26.9012	0.52774	796.198	336.495	-1.93505
sample 120	J-K2F4	0.0666	2412.91	2.82132	46.7568	44.9399	301.817	-0.045045	-0.21021	-0.12012	52.7177	51.1411	3.25826	29.8649	1168.42	-0.510511	0.21021	2.07207	28.2432	0.03003	890.721	358.003	-2.23724
sample 121	J-K2F5	0.0744	1794.35	1.41801	35.3763	26.7473	210.968	-0.0268817	-0.215054	-0.0672043	47.8495	50.7661	3.1586	25.5914	1074.64	-0.456989	0.188172	4.22043	25.1075	0.0268817	769.113	341.505	-1.85484
sample 122	J-K2M1	0.0525	2219.05	3.43238	43.6762	50.3048	408.038	-0.0380952	-0.266667	-0.133333	65.1619	90.7238	4.26667	50.8762	1220.32	-0.647619	0.247619	2.26667	38.6095	0.0380952	1131.03	419.981	-3.1619
sample 123	J-K2M2a	0.0599	2263.77	3.73623	42.4207	49.3322	266.411	0	-0.33389	-0.133556	53.8564	51.0184	4.14023	55.2755	1155.38	-0.567613	0.33389	1.48581	31.4524	0	956.043	373.923	-1.95326
sample 124	J-K2M3a	0.0657	2528.16	2.56773	42.481	43.9117	260.213	0.0152207	-0.289193	-0.121766	54.1248	73.0137	6.16438	22.1918	1055.69	-0.532725	0.182648	1.18721	28.5388	0.0152207	850.259	345.845	-2.28311
sample 125	J-K2M4a	0.0677	1986.71	2.06499	33.0724	34.4609	307.784	-0.0443131	-0.251108	-0.132939	53.6189	87.4003	19.9409	28.0502	1055.27	-0.516987	0.206795	1.18168	28.6706	0.0295421	833.752	329.882	-1.92024
sample 126	J-K2M5a	0.0673	2010.4	2.35215	35.8395	38.3507	249.688	0.0594354	-0.267459	-0.0742942	51.3224	89.4651	3.84844	38.3655	1004.83	-0.520059	0.193165	2.88262	26.3299	0.0148588	820.401	330.059	-2.05052
sample 127	A-BMt1	0.0626	2073.48	0.666134	38.5304	35.016	615.335	0.223642	-0.127796	-0.0479233	57.492	117.029	4.9361	23.0511	918.754	-0.0159744	0.495208	4.92013	24.0735	0.0958466	888.61	354.121	0.415335
sample 128	A-BMt2	0.0658	2034.95	1	33.9058	36.003	405.015	0.759878	-0.136778	0.0455927	55.4103	69.9392	9.13374	46.7477	933.571	-0.0607903	0.319149	8.54103	23.9514	0.577508	852.295	359.377	0.486322
sample 129	A-BMt3	0.0611	2255.32	1.29133	35.9411	38.4615	302.095	0.180033	-0.180033	-0.0327332	57.7741	82.7332	16.9231	41.4403	958.069	-0.0654664	0.245499	2.94599	24.8282	0.0981997	918.789	344.419	1.58756
sample 130	A-BMt4	0.0642	2102.8	0.830218	31.9003	33.4424	356.838	0.46729	-0.202492	-0.0623053	53.6916	98.4424	6.30841	24.8131	865.14	-0.0778816	0.249221	2.81931	24.8598	0.0155763	852.928	326.386	0.903427
sample 131	A-PD1	0.0579	2419.69	0.221071	36.3212	36.9257	323.316	0.120898	-0.224525	0	59.9827	77.5302	6.30397	27.0466	921.917	-0.0863558	0.310881	20.9154	26.3558	0.0518135	933.592	340.743	0.915371
sample 132	A-PD2	0.0723	2004.15	0.345781	33.5408	32.9737	217.248	0.0414938	-0.179806	-0.0276625	45.7676	75.6708	19.4744	24.8824	874.578	-0.0691563	0.207469	5.3527	22.6003	0.0276625	763.071	304.786	0.677732
sample 133	A-PD3	0.077	2387.01	0.768831	38.8571	40.039	161.247	0.142857	-0.155844	-0.0519481	45.6364	90.7532	3.32468	34.0649	947.312	-0.0649351	0.272727	7.66234	23.3377	0.025974	723.234	362.727	0.883117
sample 134	A-PD4	0.081	1918.52	0.414815	33.4198	35.1605	453.617	0.222222	-0.185185	-0.0493827	43.6173	83.7284	6.53086	25.4938	928.506	-0.0617284	0.234568	3.95062	23.5062	0.0246914	667.185	300.272	0.987654
sample 135	A-PD5	0.0727	2173.31	1.22834	36.63	38.3081	132.944	0.192572	-0.220083	-0.0275103	46.4924	70.2063	3.41128	574.553	915.309	-0.0687758	0.467675	3.56259	23.8239	0.0275103	748.776	341.362	0.508941
sample 136	A-PD6	0.0801	2006.24	0.60799	33.0462	33.4831	283.908	0.162297	-0.19975	-0.0124844	43.6205	69.6255	10.2372	24.8939	931.66	-0.062422	0.224719	1.77278	21.3358	0.0249688	680.949	291.71	1.11111
sample 137	A-PD7	0.0549	2012.75	4.47541	34.5902	44.7723	227.923	0.400729	-0.291439	-0.0182149	60.8197	59.9089	4.0255	30.0729	945.61	-0.0910747	0.309654	1.29326	27.2678	0.0182149	975.701	372.823	0.437158
sample 138	A-PD8	0.0532	2028.2	2.54699	35.6767	41.2782	1286.54	0.150376	-0.300752	-0.037594	63.9286	103.289	5.80827	33.4211	930.451	-0.093985	0.263158	2.65038	27.7444	0.093985	1020.13	363.929	0.319549
sample 139	A-PD9	0.0664	2216.87	1.98042	33.2681	42.0331	342.274	0.0903614	-0.0451807	-0.060241	52.6205	70.7982	12.1235	18.8404	820.904	-0.0150602	0.240964	2.6506	21.1747	0.0753012	794.759	311.551	0.195783
sample 140	A-PD10	0.0598	2138.8	4.60702	37.1237	47.7425	293.462	0.150502	-0.083612	-0.0668896	59.4816	72.709	8.44482	23.0435	867.993	-0.0668896	0.234114	1.77258	22.5753	0.0668896	906.739	341.137	-0.217391
sample 141	A-PD11	0.0572	2213.29	1.68182	38.6538	43.1294	289.825	0.0874126	-0.0524476	-0.034965	62.1154	57.4476	6.55594	23.6014	867.85	-0.0699301	0.244755	2.23776	24.1608	0.0699301	923.304	345.315	0.0874126
sample 142	A-PD12	0.0682	2548.39	3.48094	41.5249	49.5161	159.751	0.146628	-0.058651	-0.0293255	50.3812	99.912	3.46041	16.2757	883.328	-0.058651	0.234604	1.77419	22.4487	0.058651	784.428	319.135	0.146628
sample 143	A-PD13	0.0717	2182.71	2.59972	34.7001	40.8089	116.471	0.223152	-0.069735	-0.041841	46.569	72.9149	3.59833	20.9623	846.444	-0.069735	0.209205	3.64017	20.8647	0.041841	755.565	312.789	-0.362622
sample 144	A-PD14	0.0842	2254.16	3.77791	37.7553	45.0356	376.888	0.142518	-0.0712589	-0.0712589	40.6057	87.981	3.21853	16.6033	830.178	-0.0475059	0.166271	2.2209	18.5511	0.142518	635.618	288.468	0.0475059
sample 145	A-PD15	0.0564	2164.89	3.09043	31.1702	43.1206	302.323	0.177305	-0.0886525	-0.070922	65.4787	75.0887	13.4043	22.6064	841.489	-0.0886525	0.212766	4.64539	25.2837	0.212766	929.876	324.255	-0.0886525
sample 146	A-PD16	0.0727	2111.42	3.60523	34.6905	44.1816	65.8184	0.123796	-0.0962861	-0.0550206	46.0385	78.3769	3.75516	18.8996	785.309	-0.0687758	0.178817	3.30124	18.5144	0.151307	698.707	295.557	-0.412655
sample 147	A-BB1	0.0578	1974.05	0.546713	32.3183	27.9239	600.035	0.224913	-0.0865052	-0.0692042	62.872	109.066	8.54671	36.09	746.955	-0.0865052	0.259516	5.0173	24.1176	0.224913	897.491	347.093	-0.0692042
sample 148	A-BB2	0.0664	2147.59	0.447289	34.5934	35.0151	332.093	0.225904	-0.0753012	-0.105422	51.3404	151.024	5.93373	30.8886	790.843	-0.0753012	0.195783	3.19277	22.0331	0.0753012	793.765	308.449	-0.210843
sample 149	A-BB3	0.0746	1907.51	0.810992	33.4718	34.3968	416.206	0.630027	-0.107239	-0.0536193	46.5013	83.2708	4.57105	27.2118	771.81	-0.0670241	0.201072	2.94906	18.2038	0.080429	703.552	304.853	-0.36193
sample 150	A-BB4	0.0662	2282.48	-0.0407855	33.1873	33.0211	298.172	2.53776	-0.060423	0.135952	52.719	40.8157	16.7825	68.0363	857.205	-0.0755287	0.528701	5.5136	28.006	1.01208	833.323	368.792	0.498489
sample 151	A-BB5	0.0749	2158.88	1.83178	35.2737	40.227	109.96	0.186916	-0.12016	-0.0534045	44.753	108.652	3.16422	25.741	817.236	-0.0667557	0.213618	3.498	20.4673	0.0667557	703.925	297.69	0.400534
sample 152	A-BB6	0.0611	2042.55	1.982	34.0753	37.9214	106.907	2.71686	-0.0490998	0.114566	58.7234	125.155	8.36334	78.6252	929.984	-0.0818331	0.409165	2.81506	29.0835	1.06383	896.645	404.894	0.130933
sample 153	A-BB7	0.0754	2149.87	1.0809	36.5252	37.0557	129.642	0.106101	-0.0795756	-0.0530504	48.2626	118.103	3.27586	41.6048	902.281	-0.066313	0.185676	1.40584	21.7374	0.0265252	697.135	294.324	0.411141
sample 154	A-BB8	0.0624	2275.64	2.03045	36.9872	40.2404	153.926	0.192308	-0.0320513	-0.0801282	55.9615	36.891	4.05449	30.9295	899.343	0	0.25641	2.5	24.7917	0.0320513	830.689	325.785	0.480769
sample 155	A-BB9	0.0526	2161.6	2.8403	32.6236	40.3422	276.825	1.78707	-0.0380228	-0.0760456	67.3384	82.0532	6.5019	47.3764	897.281	-0.0570342	0.342205	8.36502	31.2928	0.0570342	1027.66	346.578	0.513308
sample 156	A-BB10	0.0692	1992.77	1.31936	35.5058	37.6156	266.633	0.144509	-0.0578035	-0.0433526	49.104	73.6416	3.56936	21.922	950.419	-0.0578035	0.231214	9.49422	24.6098	0.0433526	749.697	312.009	0.346821
sample 157	A-BB11	0.0438	2243.15	1.4863	34.7717	40.1826	99.1553	5.15982	-0.0913242	-0.0684932	79.4521	98.5388	6.16438	41.8721	902.26	-0.0913242	0.410959	6.94064	35.7078	0.136986	1202.81	386.53	1.21005
sample 158	A-BB12	0.0796	2464.82	4.16834	38.8065	48.5427	264.686	0.615578	-0.0753769	-0.0376884	42.0226	82.098	19.7487	17.3116	892.312	-0.0502513	0.263819	1.77136	21.9221	0.0879397	644.535	266.859	0.753769
sample 159	A-BB13	0.0465	2363.44	4.2	37.4624	45.9785	331.505	1.67742	-0.0645161	-0.0860215	75.7419	95.3548	11.5054	27.6989	1127.78	-0.0860215	0.301075	1.72043	33.3548	0.129032	1123.42	375.785	1.72043
sample 160	A-BB14	0.0744	2456.99	2.75806	41.4785	48.3333	505.605	0.47043	-0.0672043	-0.0537634	46.2097	59.7984	6.07527	17.1774	867.5	-0.0537634	0.174731	4.50269	21.25	0.0806452	698.011	275.874	0.268817
sample 161	A-BB15	0.0768	2109.38	3.125	34.7917	41.7839	90.2344	1.05469	-0.0520833	-0.0260417	44.9479	44.362	3.1901	27.9688	908.555	-0.0520833	0.182292	2.39583	20.5208	0.0651042	683.451	299.401	0
sample 162	A-BB16	0.0534	2359.55	2.4382	36.2734	42.0412	62.7528	1.79775	-0.0749064	-0.0749064	65.1873	132.397	5.13109	30.2247	843.371	-0.0749064	0.299625	1.81648	28.0524	0.0187266	948.82	325.749	0.168539
sample 163	A-HN1	0.0619	2297.25	6.45396	35.3958	51.874	452.036	0.0646204	-0.0646204	-0.0969305	56.7044	63.5218	6.49435	17.9645	896.43	-0.0646204	0.210016	1.4378	25.0889	0	829.451	308.901	0.0969305
sample 164	A-HN2	0.0783	2312.9	5.10217	34.6105	49.9234	305.07	0.140485	-0.0766284	-0.0766284	45.1724	78.3269	7.48404	16.7944	836.935	-0.0510856	0.280971	1.40485	17.1264	0	644.215	255.402	-0.127714
sample 165	A-HN3	0.0594	2329.97	5.14646	37.9966	48.4175	308.939	0.13468	-0.0841751	-0.10101	58.6027	88.4343	13.1145	16.0774	815.168	-0.0673401	0.185185	1.24579	21.1616	0	854.057	297.71	0.555556
sample 166	A-HN4	0.0567	2243.39	6.14815	27.3898	57.478	220.494	0.10582	-0.10582	-0.0705467	63.0511	56.0317	31.5168	27.1429	770.335	-0.0705467	0.405644	1.90476	23.9859	0.0176367	905.873	298.307	1.04056
sample 167	A-HN5	0.0565	2290.27	5.38761	33.5221	50.1239	333.522	0.106195	-3.73451	-0.0530973	62.9912	56.7611	7.52212	29.3274	1232.67	0.212389	0.265487	1.46903	25.9292	0.0353982	1167.36	355.451	0.300885
sample 168	A-HN6	0.0507	2090.73	4.94675	35.2663	46.9034	449.783	0.0591716	-8.89546	-0.0591716	65.5819	55.3254	8.48126	63.3531	1079.84	-0.0394477	0.394477	3.82643	29.3886	0.0197239	1315.13	371.262	0.631164
sample 169	A-HN7	0.0672	2007.44	5.23958	33.8988	49.6726	406.354	0.133929	-6.20536	-0.0595238	53.7202	69.3601	11.9792	47.3661	1265.42	-0.0595238	0.223214	1.78571	24.6726	0.0446429	982.842	356.473	-0.14881
sample 170	A-HN8	0.0572	1854.9	6	34.6503	50.1399	405.752	0.27972	-8.25175	-0.0174825	61.0315	147.343	6.20629	52.3077	1188.6	-0.0874126	0.437063	2.83217	30.8566	0.0524476	1139.58	378.864	0.192308
sample 171	A-HN9	0.0845	2278.11	4.66982	33.4793	48.9112	283.645	0.201183	-6.29586	-0.035503	41.3846	52.497	3.43195	35.8817	1306	-0.0473373	0.366864	1.26627	22.9231	0.035503	777.527	323.633	0.224852
sample 172	A-HN10	0.0582	2609.97	2.61168	38.9863	47.0619	387.698	0.618557	-9.82818	-0.0515464	61.0653	79.7766	11.0137	20.4124	1299.38	-0.0859107	0.343643	1.68385	31.8213	0.0515464	1127.35	379.45	0.0171821
sample 173	A-HN11	0.0723	2229.6	4.90733	38.7137	50.3596	446.985	0.0829876	-7.98064	-0.0414938	49.5021	98.5201	8.10512	17.4274	1384.32	-0.0968188	0.207469	3.43015	30.0277	0.0138313	890.581	334.053	0.0691563
sample 174	A-HN12	0.0634	2318.61	3.65773	39.6215	50.9148	269.669	0.22082	-9.14826	-0.0473186	58.47	118.817	4.40063	22.6341	1281.56	-0.0946372	0.236593	3.02839	32.3659	0.0315457	1015.76	366.672	-0.126183
sample 175	A-HN13	0.0658	2424.01	4.39818	40.4103	50.5319	277.492	0.182371	-8.66261	-0.0607903	54.8024	76.6413	13.0395	28.1003	1236.43	-0.0911854	0.227964	4.01216	30.4407	0.0303951	982.432	344.012	0.0151976
sample 176	A-HN14	0.0621	2457.33	2.26731	38.1643	46.1192	308.68	0.177134	-10.0161	-0.0644122	59.5652	100.918	21.8841	16.0225	1143.77	-0.0966184	0.322061	5.87762	32.8986	0.0322061	1025.68	355.459	0.193237
sample 177	A-Kl1	0.0788	2106.6	2.44036	31.7513	41.4213	183.033	0.203046	-7.67766	-0.0380711	46.4467	51.2056	7.82995	13.2614	1100.82	-0.0888325	0.203046	0.609137	25.1777	0.0126904	817.741	303.35	0.0380711
sample 178	A-Kl2	0.0584	2385.27	3.00514	35.5479	46.3185	260.616	0.0684932	-10.976	-0.0513699	60.137	72.6712	7.14041	23.9897	1156.73	-0.10274	0.222603	0.856164	34.1096	0.0171233	1097.59	332.791	0.0856164
sample 179	A-Kl3	0.0732	2198.09	1.40164	34.1803	39.2623	123.019	0.218579	-8.96175	-0.0546448	47.1721	59.8907	4.0847	16.2705	1183.32	-0.0956284	0.177596	0.601093	28.6066	0	823.292	301.475	-0.628415
sample 180	A-Kl4	0.073	2067.12	1.00411	31.137	35.2329	229.288	0.630137	-9.06849	-0.0273973	50.0822	57.3425	3.9726	13.1644	1143.89	0.0410959	0.219178	0.808219	25.1507	0.0136986	836.795	309	-0.205479
sample 181	A-Kl5	0.0769	2276.98	2.17815	33.9662	46.2159	257.49	0.780234	-8.81664	-0.0390117	46.788	56.515	3.91417	15.8518	1032.03	-0.0650195	0.351105	20.5852	23.5761	0.0390117	791.365	295.917	-0.273082
sample 182	A-Kl6	0.0751	2197.07	2.82823	33.3688	44.1145	328.069	0.625832	-9.18775	-0.0532623	47.6032	78.522	5.7257	12.4501	971.917	-0.0665779	0.213049	0.652463	22.2237	0	802.623	269.707	-0.0266312
sample 183	A-Kl7	0.0734	2117.17	1.99319	35.1499	39.4414	297.139	0.544959	-9.50954	-0.0408719	50.3406	83.4877	4.7139	17.1253	964.905	-0.0817439	0.258856	1.49864	22.1798	0.027248	822.807	298.828	0.108992
sample 184	A-Kl8	0.0682	2129.03	1.47067	34.1496	39.6041	191.598	0.16129	-10.2933	-0.058651	52.9326	44.3842	4.58944	13.9883	1004.75	-0.0879765	0.219941	0.674487	22.5806	0	890.821	319.164	-0.293255
sample 185	A-Kl9	0.0735	2043.54	1.46395	29.9728	34.9524	133.265	0.0952381	-9.65986	-0.0272109	48.2585	57.4966	4.05442	14.9932	878.993	-0.0952381	0.285714	0.721088	21.2517	0.0272109	841.483	292.531	-0.326531
sample 186	A-Kl10	0.0745	2281.88	2.44966	34.443	45.2752	209.154	0.134228	-9.47651	-0.0536913	50.8993	45.302	4.1745	17.6779	992.081	-0.0805369	0.241611	0.751678	23.2349	0.0536913	832.443	316.403	0.187919
sample 187	A-Kl11	0.0701	2500.71	1.25107	37.9743	49.0585	192.368	0.0570613	-10.1141	-0.0142653	51.4979	38.8873	5.87732	73.3809	735.25	-0.0998573	0.21398	0.684736	24.4793	0.0285307	867.775	261.94	-0.399429
sample 188	A-Kl12	0.0752	2046.54	1.01596	32.1809	38.617	120	0.172872	-9.32181	-0.0265957	47.4335	74.4814	4.45479	16.0505	1014.1	-0.0930851	0.212766	1.07713	23.7101	0.0398936	811.423	302.314	-0.106383
sample 189	A-Kl13	0.6544	235.33	0.12118	3.62928	4.73258	0	0	0	0	0	0	0	0	0	0	0	0	0	0	0	0	0
sample 190	A-Kl14	0.0654	2188.07	0.782875	34.6789	34.5872	114.052	-0.030581	-10.8716	-0.0152905	55.8104	59.4801	4.70948	18.8379	1020.43	-0.107034	0.183486	0.58104	26.7431	-0.0152905	933.67	317.936	-0.428135
sample 191	A-Kl15	0.077	2203.9	0.775325	33.4026	38.0519	156.039	0.012987	-9.19481	-0.038961	47.4545	52.6753	4.44156	15.2857	716.922	-0.0909091	0.155844	0.480519	24.3117	0	811.727	237.221	-0.441558
sample 192	A-O2F1	0.0713	2335.2	1.2202	29.0182	48.345	144.881	0.182328	-9.98597	-0.0140252	52.0757	82.9032	14.6844	69.7756	1064.18	-0.0981767	0.252454	2.24404	32.1038	0	863.366	339.958	-0.29453
sample 193	A-O2F2	0.0782	2650.9	1.19054	41.8286	46.8159	79.578	0.0767263	-9.07928	0.0127877	45.0512	102.289	3.87468	14.9744	1059.18	-0.0127877	0.191816	3.41432	27.1355	0.0127877	779.079	303.747	0.319693
sample 194	A-O2F3	0.0659	2257.97	0.892261	33.4446	34.9014	140.455	0.0758725	-11.0774	-0.060698	53.217	82.261	4.26404	31.7299	1144.51	-0.091047	0.212443	2.82246	31.1684	-0.0151745	932.807	330.03	-0.197269
sample 195	A-O2F4	0.0791	2156.76	1.53477	34.488	37.1934	62.1997	0.0379267	-9.14033	-0.0505689	45.3856	31.6688	3.5019	31.0367	706.005	-0.0758534	0.189633	6.35904	23.6283	0	758.635	235.664	0.0505689
sample 196	A-O2F5	0.0762	2064.3	1.44751	30.6299	35.8136	139.094	0.0524934	-9.4357	-0.0524934	48.622	50.1706	4.06824	16.9816	1127.45	-0.0918635	0.15748	2.17848	25.4724	-0.0131234	774.948	285.617	0.0787402
sample 197	A-O2M1	0.0702	2247.86	1.42023	37.6496	42.8917	444.131	0.11396	-10.3419	-0.042735	50.812	67.208	4.37322	22.8917	1236.2	-0.0997151	0.156695	1.62393	28.2479	-0.014245	848.533	356.111	-0.0997151
sample 198	A-O2M2	0.0781	2307.3	1.28297	34.1613	40.0512	327.401	0	-9.41101	-0.0512164	46.4789	94.6351	4.13572	24.0717	943.841	-0.0896287	0.153649	0.755442	23.9565	-0.0128041	756.018	305.403	0.0256082
sample 199	A-O2M3	0.0763	2546.53	1.80472	38.9384	47.3132	424.823	0.104849	-9.67235	-0.0655308	46.0944	99.8427	4.32503	46.789	1010.38	-0.0917431	0.196592	6.78899	24.1809	-0.0131062	780.904	308.978	-0.144168
sample 200	A-O2M4	0.0713	2288.92	1.2763	34.5302	43.1978	241.893	0.112202	-10.4067	-0.0280505	49.9719	64.9229	12.9313	23.5484	1027.49	-0.0981767	0.196353	3.75877	25.0491	0	850.743	326.662	0.224404
sample 201	A-O2M5	0.0745	2233.56	1.14497	35.8389	42.5235	316.081	0.0268456	-9.79866	-0.0268456	46.8859	48.2416	6.12081	15.1409	1028.78	-0.0939597	0.214765	3.4094	26.2685	0	804.98	305.852	0.187919
sample 202	A-O2M6	0.0742	2107.82	1.15633	34.4609	35.903	136.199	-0.0134771	-10.0404	-0.0404313	48.8814	78.6253	4.11051	15.903	1140.58	-0.0943396	0.148248	0.822102	26.1995	-0.0134771	819.111	307.372	0.269542
sample 203	A-O2M7	0.0714	1897.76	0.915966	28.3473	31.1064	200.84	0.0280112	-10.3782	-0.0420168	49.958	55.4482	9.11765	43.6555	742.703	-0.0980392	0.182073	1.13445	25.9524	-0.0140056	839.888	264.244	0.364146
sample 204	A-O2M8	0.0874	2266.59	0.636156	30.2517	43.9016	47.8719	0.0228833	-8.47826	-0.0343249	40.6178	33.3181	3.44394	57.0938	776.716	-0.0800915	0.1373	0.858124	21.4073	-0.0114416	684.76	246.373	-0.148741
sample 205	A-O2M9	0.0762	1964.57	0.404199	32.5591	34.2126	121.942	0.0524934	-9.72441	-0.0262467	47.7034	83.7139	4.18635	69.895	961.194	-0.0918635	0.170604	0.721785	28.6483	0.0131234	797.612	268.084	-0.19685
sample 206	A-O2M10	0.0749	2088.12	0.929239	32.2163	36.6889	310.521	0.0400534	-9.87984	-0.0133511	44.7263	60.1068	4.08545	77.1429	959.866	-0.0934579	0.280374	1.13485	29.1589	0.0133511	816.622	280.641	-0.0133511
sample 207	A-LM1	0.0641	2435.26	2.29017	40.5616	45.741	143.51	0.0624025	-11.5757	-0.0468019	54.5866	61.3885	4.72699	14.2902	1047.72	-0.109204	0.187207	0.764431	32.2933	-0.0156006	935.32	288.986	0.343214
sample 208	A-LM2	0.0713	2545.58	4.17532	33.9832	56.7181	112.707	0.0701262	-10.4067	-0.0280505	51.7111	39.8317	4.60028	11.5849	801.501	-0.0420757	0.336606	0.743338	25.9187	0	816.858	244.165	-0.0701262
sample 209	A-LM3	0.0714	2455.18	2.94958	37.9412	49.944	199.356	0.420168	-10.5602	-0.0140056	50.6162	49.2297	4.62185	16.1064	881.218	-0.0840336	0.154062	0.504202	23.1092	-0.0140056	804.44	266.499	-0.0420168
sample 210	A-LM4	0.0842	1922.8	3.23634	30.8195	41.152	195.238	0.0475059	-9.01425	-0.023753	43.361	137.993	4.54869	11.9834	1303.17	-0.0831354	0.190024	0.451306	23.9549	0	686.734	333.753	0.391924
sample 211	A-LM5	0.0904	2055.31	2.74115	30.2212	48.9049	885.52	0.143805	-8.45133	-0.0331858	38.7389	84.281	4.29204	10.4757	992.666	-0.0774336	0.154867	1.41593	22.5774	0.0331858	644.425	262.577	0.376106
sample 212	A-LF1	0.0713	2164.1	2.97616	33.913	48.6957	180.309	0.0981767	-10.6872	-0.0420757	50.014	81.3043	4.93689	18.1627	822.805	-0.0981767	0.224404	0.953717	24.0954	0.0280505	803.941	254.572	0.140252
sample 213	A-LF2	0.0734	2081.74	2.67439	35.4905	46.8392	210.599	0.0817439	-10.3815	-0.027248	47.4523	74.2507	4.22343	16.7439	956.049	-0.0953678	0.163488	0.572207	25.5041	-0.013624	799.728	297.984	0.354223
sample 214	A-LF3	0.0864	2078.7	3.61111	33.4954	44.4329	139.606	0.162037	-8.7963	-0.0231481	40.7523	180.22	4.69907	12.6852	957.963	-0.0810185	0.150463	0.578704	25.4051	0	682.812	282.176	0.451389
sample 215	A-LF4	0.0845	2092.31	3.24615	33.2071	42.8521	190.935	0.0473373	-9.08876	-0.0236686	42.568	48.3787	3.73964	21.4556	1034.08	-0.0828402	0.153846	0.95858	26.3195	0	700.71	266.533	0.142012
sample 216	A-CSF1	0.075	1926.67	3.056	31.24	40.3067	162.867	0.04	-10.2133	-0.04	46.6133	130.267	4.28	12.4	908.453	-0.0933333	0.186667	0.626667	29.3867	0.0266667	765.4	276.853	-0.12
sample 217	A-CSF2	0.0553	1866.18	0.949367	27.9747	32.7667	180.832	0.198915	-13.8156	-0.0361664	65.8409	57.4503	5.98553	62.0615	765.407	-0.126582	0.325497	1.01266	33.0741	0.0180832	1043.74	282.984	-0.0180832
sample 218	A-CSF3	0.0786	2068.7	1.24046	30.7252	36.6921	224.338	0.114504	-9.66921	-0.0636132	45.0891	72.1883	8.80407	12.3537	717.672	-0.0890585	0.178117	0.636132	24.2366	-0.0127226	711.845	228.473	0.0254453
sample 219	A-CSF4	0.0737	2002.71	0.404342	35.5495	34.0706	278.738	0.0814111	-10.4613	-0.0542741	48.9281	130.163	4.62687	19.0773	908.304	-0.0949796	0.176391	0.502035	23.4057	0	764.478	269.484	-0.420624
sample 220	A-CSF5	0.0823	2145.81	1.41312	32.7947	39.0401	149.344	0.036452	-9.31956	-0.036452	43.9125	37.7035	5.65006	22.3329	586.185	-0.0850547	0.194411	0.522479	19.1981	0	689.417	226.598	0.0850547
sample 221	A-CSM1	0.0753	2046.48	1.12882	28.1673	43.2935	111.806	0.0929615	-10.1594	-0.0265604	47.6494	45.3386	5.11288	30.6906	549.88	-0.0929615	0.159363	0.836653	22.0983	0	775.06	211.288	-0.292165
sample 222	A-CSM2	0.0705	1930.5	0.665248	30.3404	35.844	612.326	0.212766	-10.9078	-0.0567376	52.695	127.645	6.68085	38.227	955.773	-0.0992908	0.212766	0.836879	24.3121	0	812.993	280.199	-0.0567376
sample 223	A-CSM3	0.0622	2165.59	0.493569	32.8778	37.0096	308.585	0.176849	-12.4116	-0.0482315	55.4502	71.5756	5.80386	15.6431	786.141	-0.11254	0.22508	0.819936	26.0611	0	907.347	283.505	-0.707395
sample 224	A-CSM4	0.0727	2115.54	1.29023	33.0399	36.066	217.95	0.192572	-10.5777	-0.0412655	49.381	67.4691	5.88721	13.3563	790.633	-0.0962861	0.192572	0.550206	21.4993	0.0275103	777.744	249.697	-0.42641
sample 225	A-CSM5	0.0763	1986.89	1.03145	30.3801	33.2503	62.6606	0.117955	-10.0786	-0.0524246	48.2831	64.574	4.61337	11.2582	503.394	-0.0917431	0.196592	0.484928	18.0472	0	734.404	188.729	-0.209699
	missing data reading
