# Supplementary material for: Origin identification of migratory pests (European Starling) using geochemical fingerprinting
Source: PeerJ. 2020 May 4;8:e8962. doi: 10.7717/peerj.8962 (PMC7204882; doi:10.7717/peerj.8962)
Supplement: Supplemental Information 1 [file peerj-08-8962-s005.xlsx]

## Sheet: Sheet1
Code	ZK	ZMg	ZNa	ZSr	ZMo	ZAg	ZCd	ZSn	ZBa	ZPb	ZAl	ZS	ZSc	ZV	ZCr	ZMn	ZCo	ZCu	ZZn	ZSe
Kel1	-1.00759	-1.6062	-1.53929	1.68271	0.962945	0.963792	1.0554	-1.1249	1.36902	-0.24407	-0.437161	2.78973	0.568885	-0.269854	0.418125	-0.212817	0.105379	-1.02435	2.6348	-1.06673
Kel2	-0.830521	-1.30774	-2.22189	1.18612	0.405429	0.681159	0.952414	-0.921004	-0.427805	-0.482551	-0.472372	0.527829	0.183723	-0.558623	-0.205414	-0.0649002	-0.00397076	-0.810202	-0.324119	-1.63801
Kel3	-0.733512	-2.06487	-1.06236	-0.457154	-0.15764	0.921213	0.878373	-1.64284	-0.610317	-0.643663	-0.690366	-1.67559	0.471879	-0.879816	-0.249596	-1.18338	-0.231664	-1.55449	-2.80609	-1.07521
Kel4	-0.982217	-1.48555	-2.59198	-0.252284	0.278986	0.779641	0.906186	-1.35824	0.458298	-0.295155	-0.605349	-0.805732	0.285327	-0.679146	-0.231326	-0.798523	-0.132927	-1.2207	-1.57383	-1.21766
Kel5	-1.09726	-2.48385	-1.13802	-0.44925	-0.257486	0.494307	0.88091	-1.08512	-0.345216	0.558053	-0.644783	-1.48321	0.169273	-0.632644	-0.250391	-0.869413	-0.255433	-1.07927	-1.43003	-1.46267
Kel6	-1.11553	-1.35305	-0.666266	0.425137	0.796649	0.572537	1.07105	-1.45731	1.29636	1.17347	-0.479673	-0.238755	0.355717	-0.432238	-0.293261	-1.13861	-0.0250663	-1.41291	-1.40662	-1.00107
Kel7	-0.938259	-1.48267	-0.62204	-0.868021	-0.165025	0.684325	0.937754	-1.62486	-0.867165	-0.302949	-0.574947	-0.726255	0.353885	2.77514	0.0843724	-1.42107	-0.0309226	-1.55945	-1.86354	-0.506179
Kel8	-1.07575	-1.45286	-0.459015	-1.21855	-0.0816115	0.250583	0.769391	-1.0558	-1.14211	-0.340242	-0.671197	-1.61286	-0.0259252	-0.634998	-0.13594	-0.981958	-0.263108	-0.866758	-2.11161	-1.43809
Kel9	-1.14104	-1.45809	-0.860718	-1.3925	-0.227718	0.203731	0.950765	-0.975923	-1.27157	-0.255628	-0.630146	-1.33353	-0.0201145	-0.678427	-0.281021	-0.665866	-0.262677	-0.77922	-2.40874	-1.29263
Kel10	-0.663077	-0.919647	-0.582544	-0.117433	3.04711	0.487212	1.22059	-0.991107	0.785165	7.28632	-0.0963609	1.76589	0.00757009	0.370941	-0.0939044	0.389581	-0.132927	-0.94991	1.35112	-1.03111
Kel11	-1.11404	-1.01452	-0.657868	0.062681	0.657443	0.767804	0.948188	-0.866246	-0.46578	-0.36336	-0.624715	0.696667	0.0612761	-0.58937	-0.266062	-0.229263	-0.263916	-0.925586	-0.437982	-1.38388
Kel12	-0.0863646	-1.27912	-0.0810925	0.454712	0.555621	-0.155076	0.995042	-0.200101	1.66244	1.14446	0.0291121	2.2081	-0.464111	0.817189	-0.214619	0.835136	0.0297599	-0.14994	1.95204	-1.50797
Kel13	-1.05	-1.79812	-0.744588	-0.267978	0.365177	-0.0470218	0.944763	-0.865645	0.280531	0.0253711	-0.324104	1.05372	-0.0590191	-0.158091	-0.170208	0.109051	-0.265563	-0.900092	-0.580193	-1.6119
Kel14	-1.03383	-1.30288	-0.874827	-1.06228	-0.127614	-0.326332	0.746733	0.0745741	-0.66453	-0.101348	-0.573524	-0.26859	-0.574787	-0.440273	-0.262266	0.174519	-0.132927	0.0414632	-0.721324	-2.21402
Kel15	-1.2445	-0.771194	-0.426532	0.879454	1.80236	0.116278	0.884066	-1.22963	1.21968	-0.355047	-0.495738	2.59974	0.183765	0.328931	-0.130174	-0.0154919	-0.132927	-1.22967	1.52556	-1.04234
Kel16	-1.21153	-1.83582	-0.606647	0.546448	1.3547	0.367882	1.07228	-1.4862	0.268937	1.92858	-0.152835	2.43416	0.366964	0.209042	0.18615	0.233962	0.0810279	-1.55694	0.768943	-0.812859
Kel17	-1.1783	-0.41973	-0.540173	-0.0421851	2.19249	-0.00304499	1.30569	-1.0905	2.5157	0.0242615	-0.411399	2.04429	0.0738344	-0.0832066	-0.227917	0.773517	-0.132927	-1.11423	0.245957	-0.743288
Kel18	-0.514691	-1.09766	-0.401647	-1.1772	-0.194078	-0.233336	0.933952	-0.844619	-0.403274	-0.388875	-0.390851	0.753497	-0.129098	-0.378668	-0.170736	0.201618	-0.132927	-0.766243	-0.4307	-1.20881
Kel19	-1.01056	-1.40763	-0.555732	1.26643	0.014229	-0.479997	0.937649	-0.731326	-0.115008	-0.157816	-0.491697	-0.0924095	-0.105136	0.390813	-0.120335	-0.141399	-0.132927	-0.794395	-0.635033	-0.923755
Kel20	-0.525602	-1.20644	-0.090674	0.33038	0.915053	1.39437	0.76066	-0.351938	0.189333	-0.172945	-0.0227323	-1.00553	1.43077	-0.157559	-0.288222	-1.17336	0.265172	-0.581143	-1.63224	0.744708
V1S1	1.22866	0.265394	1.18402	-0.340976	-0.033477	1.29344	0.765286	-0.634654	-0.461965	-0.559941	0.444584	-1.09345	0.843504	-0.126739	-0.143446	-1.30055	0.261168	-0.575117	-1.08677	0.313582
V1S2	1.58611	0.547643	0.254884	0.166014	-0.119877	1.14871	0.765721	0.0983367	-0.0210572	-0.445701	2.59176	0.0282039	0.500359	-0.316114	-0.267756	-0.509204	0.195171	0.264935	0.415132	-0.00857574
V1S3	1.07398	1.19238	0.664309	1.82344	0.387944	1.2432	0.627038	-0.392015	2.26199	-0.464768	-0.242522	0.590521	0.660159	-0.529573	-0.296334	-0.0767954	0.295206	-0.260967	0.230346	0.0865938
V1S4	0.00102075	1.01842	-0.192076	0.268817	0.129431	0.712853	0.867397	0.303374	-0.496107	-0.428704	1.47822	1.33156	0.456999	-0.120437	-0.271641	0.277934	0.376591	0.460655	0.87113	2.00168
V1S5	1.09625	-0.371013	0.73224	0.706795	0.31912	0.858407	0.753715	0.307633	0.251111	-0.33891	1.73917	1.25333	0.341833	0.40663	-0.144295	1.16458	0.372212	0.429795	0.682287	0.234225
V1S6	0.972416	0.918003	-0.836713	-0.172664	-0.251887	0.942277	0.782491	1.35029	-0.183381	-0.156604	1.5448	1.39921	-0.00653196	-0.0485709	-0.266409	1.4223	0.499079	1.51539	1.48903	-0.249582
V1S7	0.330791	-0.565167	-0.332792	0.114592	-1.21676	-0.352057	-0.991979	1.34641	-0.033654	-0.284606	-0.0519711	-0.418448	1.7289	0.302844	-0.275406	0.511636	1.56942	1.40356	1.00753	0.330847
V1S8	1.67577	-0.25858	1.13391	1.11179	-0.357394	-0.707728	-1.33676	-0.102489	2.40745	-0.0438715	7.56426	1.13351	0.407536	0.685787	-0.243176	0.25551	0.348284	-0.0164015	1.74519	0.956097
V1S9	1.75009	0.13182	0.121001	0.794413	-0.486443	-0.23882	-0.811113	-0.990476	2.31359	-0.42132	0.00844587	0.175725	0.631418	-0.673528	-0.258306	-1.10971	0.111321	-1.07089	0.395699	0.256565
V1S10	0.281888	-0.395731	0.193994	0.481383	-0.882233	-0.310819	-0.890984	-0.722444	4.35978	-0.343506	-0.186957	-0.581576	0.538681	0.00922316	-0.286984	-0.672198	0.13196	-0.79379	-0.425564	0.457636
V4F1	2.26174	0.915447	0.194406	0.856249	-0.482143	-0.359818	-0.795283	-0.697547	1.50545	0.266714	-0.04416	1.31769	0.540975	0.596814	2.12948	-0.554597	1.05677	-0.89938	1.68073	0.327365
V4F2	2.10533	0.779969	0.16063	0.166565	-1.46489	-1.47085	-1.46817	0.521027	-0.13465	-0.0462354	2.08061	1.14501	0.0690048	1.03913	1.02133	0.0605024	0.605902	0.42887	1.8285	1.79816
V4F3	0.941924	0.254984	0.518451	0.745339	-1.38618	-0.917886	-1.13069	-0.229821	0.80889	-0.344467	1.3671	-1.29126	0.343322	0.610412	-0.262745	-0.925151	0.175438	-0.36908	-1.00821	0.986709
V4F4	-0.19801	0.869839	-0.850001	0.643824	-1.36402	-1.74379	-2.10293	1.06472	1.00629	-0.0218162	0.333563	-0.444859	-0.0663983	-0.174784	0.0690105	-0.0978906	0.266622	0.839808	0.111335	0.086604
V4F5	-0.187267	1.09041	-0.683434	1.31692	-1.07035	-1.06422	-1.20009	-0.0478425	0.274542	-0.446629	-0.231806	-0.295887	0.302428	0.361894	2.21234	-0.94057	0.81947	-0.173194	-0.182178	0.496244
V4M2	0.108027	2.4121	-1.1306	0.395272	-0.959553	-0.620517	-1.19014	-0.259934	-0.38136	-0.389952	1.06548	-0.920148	0.256818	0.62258	3.20548	-0.902441	1.22794	-0.446054	-1.04777	0.496312
V4M3	0.580499	0.764745	-0.427127	-0.085933	0.512895	-0.695492	-1.04413	-0.344621	-0.523191	-0.392052	-0.556688	-1.01585	0.394334	-0.405316	0.0719041	-1.28412	0.164085	-0.491643	-0.839629	0.753114
V4M4	1.66627	-0.898217	0.434569	0.296413	-0.321904	-1.64442	-1.51258	0.272347	-0.252462	-0.238075	0.712842	1.80266	0.18831	5.24662	8.36481	0.196265	2.60998	0.0558314	1.87444	1.1774
V4M5	1.92212	-0.902271	1.31346	0.324776	-1.19708	-1.06933	-0.997634	-0.391026	-0.348201	-0.436865	1.27118	0.852188	0.359487	0.540035	1.62542	-0.00794279	0.476607	-0.367418	0.945556	1.09701
V4M1	2.10514	0.153094	1.07513	-0.506431	-0.90246	-0.883864	-1.05586	-0.466504	-0.500899	-0.496366	-0.319989	-0.894342	0.445743	-0.392622	-0.316251	-0.644888	0.152643	-0.634804	-0.94762	1.02552
V8F1	0.388352	-1.40245	-0.110629	-0.343192	-0.430946	-0.440301	-0.689882	-1.03424	-0.523395	-0.428475	-0.196665	0.241795	0.652035	1.07293	-0.307903	-1.02603	0.226562	-1.16688	-0.375215	1.93711
V8F2	0.356003	-0.641998	0.17414	-0.354551	-0.898051	-0.780954	-0.926229	-0.594529	0.120629	2.90369	0.479666	-1.16248	0.417974	0.330888	-0.312294	-0.912948	0.136381	-0.764913	-0.898725	0.607575
V8F3	-0.404035	-0.19818	-0.511549	-1.11821	-1.31994	-2.66004	-1.48877	1.66786	-0.837582	0.164104	0.785318	-0.826848	-0.337273	2.92074	-0.280746	1.12543	1.01666	1.60334	0.237611	0.590846
V8F4	1.61501	0.193572	0.653607	0.544932	-0.954773	-1.3965	-1.36147	0.302026	1.50724	-0.192509	0.247293	1.73118	0.20733	1.81942	-0.285922	0.124992	0.205703	-0.00393532	1.27821	0.816151
V8M1	-0.554776	1.31447	-0.922968	2.09671	-1.16919	-2.26003	-2.56693	1.51186	3.38241	-0.0310787	1.37296	0.956778	-0.235199	3.13241	-0.298079	1.14944	0.304189	1.34952	2.16697	0.592231
V8M2	-0.230412	1.30678	-0.480196	0.234845	1.02508	-1.14174	-1.27296	-0.350151	0.0558436	-0.49032	-0.0117113	-1.15272	0.269689	-0.540761	-0.30725	-1.13751	0.166844	-0.489606	0.257204	1.06734
V8M3	0.132911	0.907465	-0.559666	0.347914	0.49432	-0.932574	-0.950109	-0.494815	0.718452	-0.398944	-0.322398	1.85855	0.343142	0.14927	-0.321533	-1.09399	0.151754	-0.602264	-0.875372	0.785398
V8M4	0.426185	0.328176	-0.441313	-1.05481	-1.12375	-0.840521	-1.06778	-0.205507	0.278413	-0.463264	0.0370976	-0.444179	0.439029	-0.296572	-0.319752	-0.984191	0.154138	-0.546789	-1.26872	1.28351
V8M5	-0.0976599	1.61283	-0.321576	1.1671	-0.640048	-1.26708	-1.37657	-0.15118	2.33832	-0.425871	-0.1258	2.38369	0.209062	-0.461206	-0.315689	-0.47474	0.179299	-0.242629	0.484955	1.44111
V6M1	-0.128008	1.90971	0.380462	-0.619639	-1.6245	-1.88825	-1.76037	0.8041	-0.351296	-0.0535336	1.30779	-0.0270763	-0.091384	0.411571	-0.316253	-0.349892	0.24102	0.423537	0.0464636	1.24905
V6M2	-0.275418	1.04706	-0.863486	1.43417	-1.02527	-1.62256	-1.4956	0.0412788	1.30379	-0.346149	-0.0641641	0.371794	0.197879	0.42627	-0.318099	-0.599866	0.207806	-0.0477269	-0.0296025	0.937127
V6M3	-1.19241	2.31921	-1.80908	-0.959687	-1.32317	-2.33046	-2.18733	1.1057	-0.734675	-0.21909	0.156237	-0.251611	-0.111985	-0.343222	-0.306008	0.0697204	0.07192	0.958997	-0.334718	0.848148
V6M4	-1.36644	1.04424	-1.51871	-0.955726	-1.31278	-1.88157	-1.69673	0.423257	-0.74148	-0.320207	-0.245085	-0.207916	-0.0525253	0.0258997	-0.326589	-0.214088	0.0500551	0.398909	0.24732	0.346286
V6F1	-1.05364	0.124716	0.00805752	0.277735	-0.697291	-1.03672	-0.9856	-0.356175	-0.927435	-0.384434	-0.458831	-0.935019	0.428824	0.541265	-0.323201	-1.24391	0.0117407	-0.583096	-0.246357	0.227243
V6F2	-0.5212	1.38789	-0.320751	0.469403	-1.93108	-2.94984	-2.77381	1.62152	0.0762216	-0.129729	-0.20518	-0.579145	-0.515097	0.212195	-0.160092	0.316801	0.0975689	1.47101	0.322319	1.11221
V6F3	-0.599929	-0.24545	-0.542295	-0.698319	-0.943808	-0.82192	-0.915741	-0.744583	0.314309	-0.50778	-0.462035	-1.34707	0.424378	-0.146811	-0.296565	-1.44642	0.00106906	-0.887252	-0.82263	0.934308
V6F4	0.868499	-0.118002	-1.04498	-0.666048	5.17153	-1.12371	-0.948233	-0.378589	-0.637871	-0.0902743	1.42601	-0.8036	0.389984	4.49018	-0.2451	-1.3774	0.314043	-0.367462	-1.1187	0.842709
V6F5	-0.84557	-0.75779	-0.916311	0.571226	-1.24677	-1.0424	-1.0015	-0.546413	-0.436236	-0.51151	-0.517999	-0.581821	0.476388	-0.457716	-0.278277	-0.929392	0.285198	-0.777293	0.204394	0.704483
N1bF1	-1.27812	0.0238407	-0.975857	-1.0159	0.278165	0.662596	0.307111	0.963556	-0.767168	-0.383192	-0.385145	-0.294478	0.460055	0.423027	1.52612	1.0696	-0.509441	0.925946	0.238342	0.129212
N1bF2	-0.603447	0.372468	-1.00805	0.055783	-0.135633	0.657039	0.356905	0.535833	-0.274103	-0.39401	0.00137293	-0.0574258	0.529219	-0.690078	-0.316362	0.662175	-1.0229	0.665645	-0.312379	0.0798219
N1bF3	-0.466427	-0.383017	-0.0407427	-0.586786	-0.200082	0.077426	-0.0828119	2.43832	-0.119615	-0.102249	-0.110388	-0.0414465	0.144746	-0.43327	-0.286347	1.511	-1.30812	1.98199	0.618649	-0.0460499
N1bF4	-0.251179	0.695064	0.0383327	-0.487951	-0.0629332	0.639894	0.275237	0.345783	0.0183257	-0.370357	-0.374967	0.137211	0.579921	-0.714062	-0.0499131	-0.168084	-0.814818	0.336374	-0.335628	0.285038
N1bF5	0.569156	0.212979	0.892062	-0.0866396	1.06474	0.606743	0.530864	0.219872	-0.443489	-0.452162	-0.376403	0.16077	0.611181	-0.0943776	1.26408	0.650325	-0.298762	0.328908	0.271475	0.314861
N1bF6	-1.2186	0.208873	-0.272643	-0.596153	-0.0832705	0.205762	0.262391	0.942344	-0.68228	-0.254327	-0.369385	-1.0985	0.397937	-0.627976	-0.329298	0.678171	-0.922821	1.13126	-0.392041	-0.0285609
N1bF7	-1.34548	1.38303	-0.128602	-0.563151	0.0654688	0.15658	0.184841	1.62157	-0.608264	-0.240127	0.169837	0.0217804	0.290217	-0.645076	-0.293929	1.47526	-0.98675	1.50338	0.381439	0.582715
N1bM1	-0.541669	1.39011	0.712598	-0.268975	0.0082075	0.528587	0.693609	-0.104894	-0.526286	-0.556143	-0.598131	0.223001	0.704118	-0.724335	-0.308108	0.0937317	-0.74111	-0.00505202	-0.185307	0.662199
N1bM2	-0.921707	0.349709	-0.417524	0.168986	0.0654688	0.236436	0.279998	0.868522	-0.189667	-0.258825	-0.272411	-0.108155	0.422393	-0.454136	-0.243543	0.822239	-0.908307	1.13583	0.081464	0.10854
N1bM3	-0.668304	0.761914	0.545325	0.329755	0.131307	1.1714	0.372318	0.412293	-0.80113	0.076755	-0.454477	-0.245129	1.07431	-0.811679	-0.0502285	0.609922	-0.832202	0.554632	-0.363733	0.150328
N1bM6	0.412316	0.585379	0.152632	0.550966	0.0654688	0.932024	0.0962767	0.517746	0.613653	-0.274442	-0.383181	-0.347277	0.514243	-0.740452	-0.257106	0.451838	-1.03401	0.59665	-0.26438	-0.558278
N1bM7	-0.316484	0.504292	0.1253	-0.998923	-0.131167	1.0344	0.255443	0.526725	-0.590547	-0.333171	-0.000119813	-0.972146	0.425524	0.351618	0.400501	0.144471	-0.655054	0.534156	-0.274676	0.0309021
N4F1	-0.707522	-0.523182	0.371211	-1.02999	-0.0800234	0.942038	0.551103	0.879036	-0.524038	-0.231157	-0.155731	-1.21478	0.282337	-0.641721	-0.30991	0.298999	-0.712414	1.07112	0.0302285	0.31736
N4M1	0.653112	-0.164347	1.60179	0.672361	-0.0358051	1.1715	0.474965	-0.533963	-1.13366	-0.518278	-0.566585	0.0388364	0.721979	-0.786024	-0.292183	-0.426418	-0.670752	-0.516892	-0.251647	0.250631
N1BM4	-0.0164504	0.206879	-0.229457	-0.0894512	-0.137877	0.643451	0.347271	0.776893	-0.505675	-0.410307	-0.321337	0.117243	0.381052	-0.74113	-0.258169	0.30547	-0.85285	0.656379	0.189097	0.16698
N1BM5	-0.9544	0.68367	-0.636238	-0.241042	-0.621211	-0.204517	-0.464618	3.86372	-0.0540336	0.0246963	-0.0156015	-1.36558	-0.546882	-0.0949165	-0.312858	2.89899	-1.65237	3.96328	1.03482	-0.382073
N1BM8	-0.549777	-0.370206	0.163132	-0.863095	-0.18865	0.652808	0.168188	0.225507	-0.770281	-0.404109	1.2244	-0.717806	0.465604	-0.397046	0.184303	0.0502018	-0.638998	0.377828	-0.124976	0.333661
N4F2	-1.13428	0.59877	0.0222386	-1.17849	-0.0801259	0.552311	0.148658	1.20574	-0.541406	-0.383019	-0.125275	-0.666735	0.281317	-0.4564	-0.282871	0.506797	-1.09942	1.09294	0.913013	0.867659
P1F1	0.885437	1.34139	2.06286	-0.899506	-0.222876	0.334073	0.159131	0.960168	-0.798169	0.21927	-0.549673	-0.806241	0.29546	-0.708335	-0.148893	0.366829	-0.132927	1.13171	0.0898712	0.541603
P1F2	1.70944	1.40159	2.4864	-0.513797	0.113116	1.41677	0.431287	-0.817648	-0.126806	0.50441	-0.697179	-1.08407	1.16042	-0.934877	-0.280946	-1.05523	-0.132927	-0.818967	-1.22066	0.507512
P2M2	-0.0810192	0.592266	1.70558	0.848604	-0.144347	1.05281	0.190751	0.806345	-0.0659456	-0.233612	-0.145098	-0.0685021	0.338162	-0.665488	-0.312684	0.754023	-0.132927	0.680685	-0.164137	0.458059
P4F1	1.2804	-0.652613	1.4655	-0.701563	-0.025304	0.419726	-0.116027	2.29805	-0.115293	4.65508	0.030346	-0.243531	-0.0761267	-0.48911	-0.112436	1.96594	-0.132927	2.37835	0.890027	0.941682
J-PD1	0.447268	0.124443	1.30667	-0.119652	0.405046	1.29438	0.470553	0.131098	-0.127558	0.529608	-0.498887	-0.388688	-2.59272	-0.395136	-0.270105	2.02357	0.949087	0.30656	-0.00074118	-1.28448
J-PD2	1.63863	1.49032	2.4869	6.70523	0.498772	0.85619	-0.214983	1.08421	-0.551857	-0.279481	-0.457913	0.424562	-3.95785	-0.0103669	0.0931975	2.29707	1.47784	1.62638	1.81607	-1.80289
J-K2F1	1.54699	0.250625	1.51706	-0.0218154	0.527142	1.25829	0.795707	-0.36715	-0.346242	-0.487799	-0.593585	0.21015	-2.05803	-0.475887	-0.27046	0.313152	0.939717	-0.38201	0.310823	-0.958417
J-K2F2	2.04449	1.24989	2.06549	-0.94269	3.22695	0.853487	0.679281	0.277032	-1.13738	-0.273695	0.207203	0.279987	-3.09573	0.111769	-0.276072	1.85583	7.87128	0.770987	1.30868	-1.34829
J-K2F4	1.60868	0.774433	2.12545	-0.824254	-0.127374	0.913199	0.274061	-0.160751	-0.930866	-0.566931	-0.460804	-0.335597	-2.61709	-0.495709	-0.235005	0.79925	0.208442	0.0350739	-0.399909	-2.31156
J-K2F5	0.587233	0.971536	0.36355	-0.899351	-0.0892869	0.551786	0.508476	0.712666	-0.588145	-0.419131	-0.375868	0.79692	-3.50257	-0.340483	-0.023056	1.90377	0.277995	0.699325	1.21117	-2.59831
J-K2M1	2.62616	0.952299	4.04199	-0.23639	-0.111869	0.548236	0.0781548	1.20174	0.0199028	-0.360565	0.014547	0.313264	-4.26596	-0.281724	-0.21191	3.54868	0.337958	1.60457	1.17045	-3.65147
O2F1	-0.848516	-0.65552	-0.71549	-0.687188	-1.45874	-1.53144	-1.71239	0.615408	-1.02678	0.0222504	-0.451565	-1.31607	0.0756845	-0.436436	-0.295013	-0.224823	0.0510368	0.325013	0.0920562	0.979127
O2F2	-0.308973	-0.6168	0.715919	1.60336	-0.240906	-0.58101	-0.8471	-0.729615	-0.544821	-0.192994	-0.646309	-0.52163	0.51044	0.34188	-0.316897	-1.34157	0.00265874	-0.875343	-0.74733	0.597194
O2F3	-0.125631	0.0425754	0.176807	-0.604994	0.272171	1.0466	0.935243	-0.5955	-0.539494	0.441361	-0.42681	-0.442872	0.495812	-0.601362	-0.306477	-0.415347	-0.544569	-0.346569	-0.372455	0.265452
O2F4	-0.570956	0.289278	-0.0403038	0.252626	0.328854	0.636394	0.929714	-0.463404	-0.389694	0.898698	-0.578019	-0.389844	-0.156575	-0.633241	-0.31708	-0.373684	-0.552546	-0.293387	-0.337299	-0.474336
O2F5	-0.626694	-0.299059	-0.405556	-0.434455	0.531481	0.657506	0.934671	-0.464864	-0.675108	-0.226092	-0.504671	-0.450826	-0.330369	-0.643882	-0.316336	-0.617019	-0.407905	-0.352447	-0.337299	-0.11224
O2M1	-0.259865	-0.855959	-0.622054	-0.911194	-0.0359045	-0.725471	0.474234	3.22556	-0.851608	1.05844	0.0391913	-1.33666	-2.30274	-0.227727	-0.280281	1.55389	-1.20963	2.97517	0.995292	-0.89858
O2M2	-0.0130251	0.277402	0.337257	-0.729714	0.60915	0.470709	0.97041	-1.05386	-0.480472	0.796299	-0.577198	-0.378666	-0.163053	-0.605526	-0.272227	-1.34554	-0.373533	-0.909966	-0.78398	-0.0397058
O2M3	-0.128102	-0.454196	-0.161267	-0.43491	0.489697	0.741493	0.986335	-1.16349	-0.785292	-0.273489	-0.569205	-0.468882	-0.0426207	-0.575204	-0.322497	-1.69569	-0.470862	-1.10809	-0.937229	0.0851384
O2M4	-0.492618	-0.309343	0.106112	-0.613079	0.558938	0.1169	0.715986	-0.27543	1.08139	-0.294058	-0.339036	-0.105886	-0.560725	-0.189964	-0.292099	-0.316212	-0.569696	-0.180115	-0.251485	0.141776
O2M5	-0.663576	0.12439	-0.287184	0.0326533	0.435718	0.122482	0.733813	-0.408512	-0.560318	0.369508	-0.566295	0.142446	-0.479832	-0.406794	-0.251511	-0.634716	-0.554264	-0.309009	0.53005	-0.118625
O4F1	0.524207	-0.736392	0.266388	-0.595869	0.165808	0.0518302	0.943558	-0.663021	-0.533583	-0.286838	-0.0709452	-0.201067	-0.366123	-0.535539	-0.270722	-0.469607	-0.532573	-0.491752	-0.696891	0.0408165
O4F2	-0.650163	-0.397632	0.168593	-0.191872	0.868154	-0.236851	0.765993	0.251833	-0.0689715	0.71115	-0.459912	0.0456138	-0.849494	-0.525765	-0.25678	0.209742	-0.624781	0.29404	0.819136	-0.0567366
O4F3	0.632492	-0.487885	0.188854	0.168038	0.286312	-0.131379	0.915722	-0.173144	-0.27675	0.158264	-0.531305	-0.102152	-0.686421	-0.603209	-0.267374	-0.0498453	-0.57273	-0.241184	0.0381048	0.0983102
O4M1	-0.18596	-0.682372	0.0305882	-0.410682	0.115324	0.06327	0.853533	-0.696965	-1.2046	-0.463908	-0.622057	0.170076	-0.452116	1.10597	-0.265783	-0.648581	-0.530066	-0.566536	-0.496506	-0.0752208
O4M2	-0.19618	-0.332602	0.0257932	-0.513399	0.492679	0.322538	0.984688	-1.14644	-0.712768	-0.12934	-0.697044	0.019713	-0.140027	-0.208738	-0.270602	-0.806831	-0.359801	-1.13416	-0.933188	-0.00463354
O4M3	0.449537	0.25412	0.497	-0.00973258	0.50797	1.29704	0.58711	-0.555285	-0.111277	0.00842139	-0.512366	0.568743	1.33783	-0.674844	-0.26096	-0.0723006	-0.655137	-0.651011	0.232066	0.530622
O4M4	-0.476813	0.249777	-0.460358	-0.816862	0.564259	1.28867	0.669741	-0.605161	-0.488421	-0.209463	-0.486976	0.373796	0.935421	-0.539723	-0.306173	-0.0939833	-0.662701	-0.553351	-0.354359	0.392638
O4M5	-0.279641	-0.750061	-0.0211671	-0.278529	0.497684	1.08315	0.425049	0.294088	0.346084	-0.288752	-0.368613	0.797287	0.623875	-0.316676	-0.311924	1.25453	-0.788732	0.260131	0.14497	0.377751
